# Supplementary material
Source: PubMed Central journal article supplement (PMC3689933)
Supplement: Supp_Fig5.pdf [file Supp_Fig5.pdf]

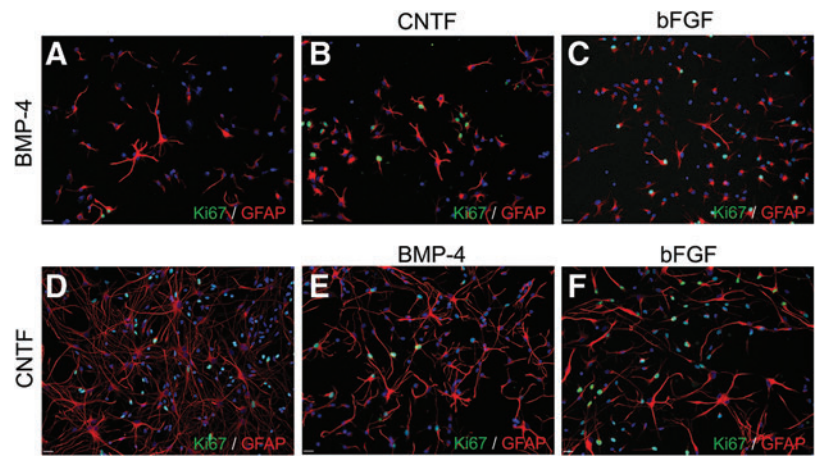

**SUPPLEMENTARY FIG. S5.** Phenotypic plasticity of differentiated glial restricted progenitors (GRP): Ki67. Human GRP were differentiated for 10 days with bone morphogenetic protein 4 or ciliary neurotrophic factor, challenged for an additional four days with an alternate factor, and double stained with nestin and glial fibrillary acidic protein antibodies for evaluation of immature and mature phenotypes, respectively. Scale bar=50  $\mu$ m.
