# Supplementary material
Source: PubMed Central journal article supplement (PMC3689933)
Supplement: Supp_Fig6.pdf [file Supp_Fig6.pdf]

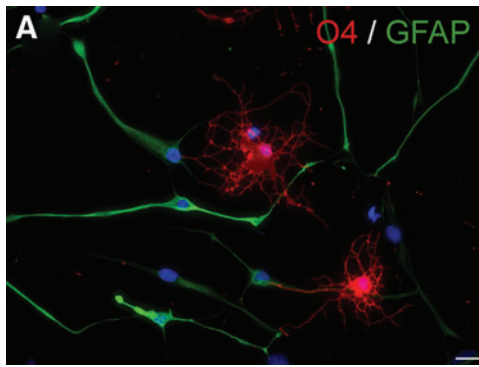

**SUPPLEMENTARY FIG. S6.** Phenotypic analysis of human glial restricted progenitors (hGRP) differentiation using a marker for immature oligodendrocytes, O4. hGRP were differentiated for 10 days with bone morphogenetic protein 4, ciliary neurotrophic factor (CNTF), or basic fibroblast growth factor and double stained with O4 and glial fibrillary acidic protein antibodies to evaluate oligodendrocytes and astrocyte-lineage phenotypes, respectively. Panel A shows the staining pattern for hGRP treated for six days in the presence of CNTF and indicates large numbers of O4-positive cells. Scale bar= 10  $\mu$ m.
